# Supplementary material for: TMEM17 depresses invasion and metastasis in lung cancer cells via ERK signaling pathway
Source: PubMed Central journal article supplement (PMC5642586; doi:10.18632/oncotarget.19977), 2017-08-07
Supplement: oncotarget-08-70685-s001.pdf [file oncotarget-08-70685-s001.pdf]

# TMEM17 depresses invasion and metastasis in lung cancer cells via ERK signaling pathway

## SUPPLEMENTARY MATERIALS

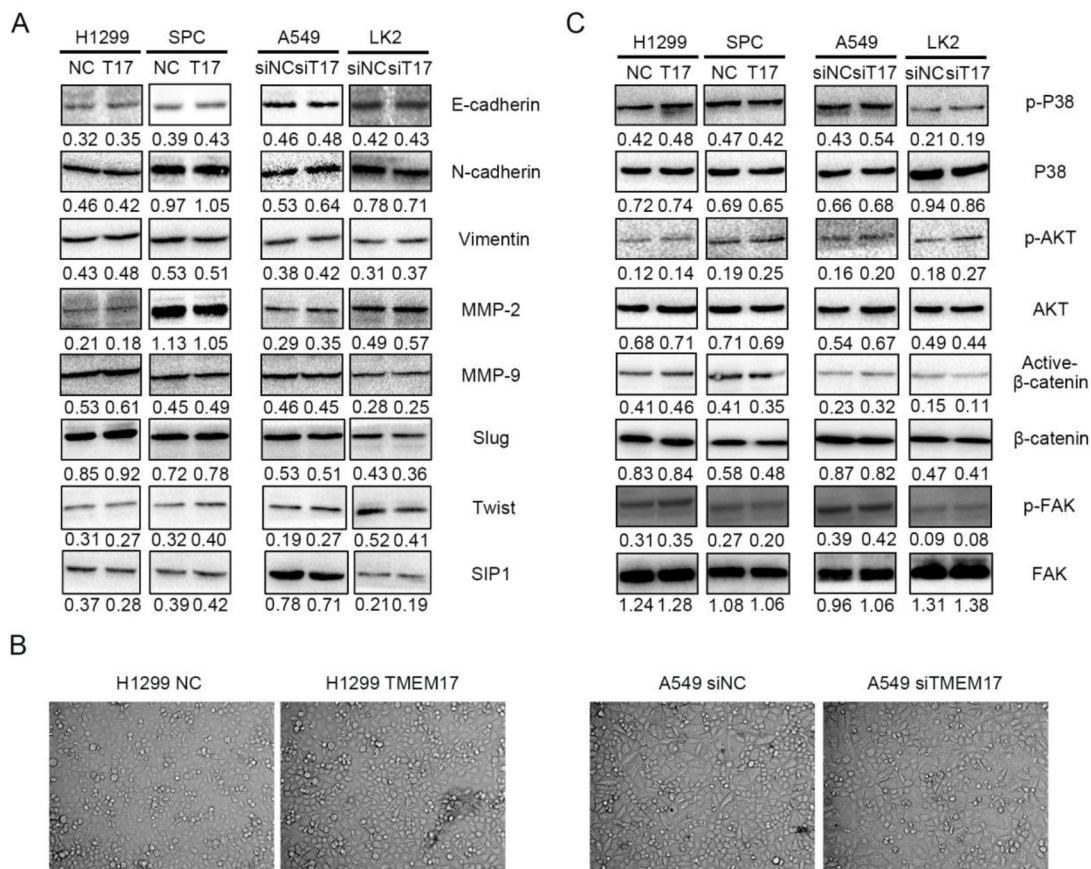

**Supplementary Figure 1: The change of the expression of key proteins after modulating TMEM17.** (A) E-cadherin, N-cadherin, Vimentin, MMP-2 and MMP-9 displayed no obvious changes after regulating the expression of TMEM17. (C) The cell morphology also revealed no remarkable changes followed by overexpression or depletion of TMEM17. (C) Other signaling pathway key proteins such as p-P38, p-AKT, Active-β-catenin, and p-FAK showed no obvious alterations after overexpressing or depleting TMEM17. T17 was short for TMEM17

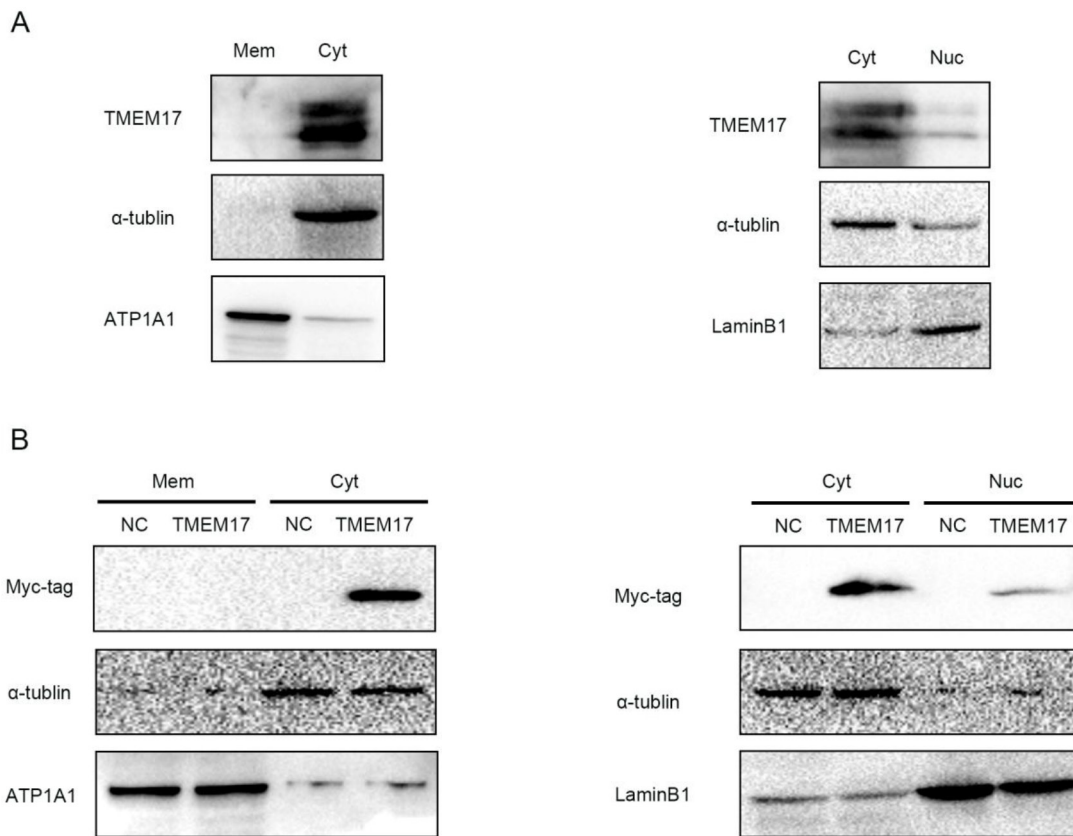

**Supplementary Figure 2: The subcellular localization of TMEM17.** We performed membrane and cytosol protein extraction (A and B, left) as well as cytosolic and nuclear protein extraction (A and B, right) in A549 (A) and H1299 (B) cells followed by TMEM17 depletion. The results suggested that both endogenous and exogenous TMEM17 mainly localized in the cytoplasm
